# Supplementary material
Source: publisher site journal article supplement (https://neobiota.pensoft.net/article/59134/download/suppl/36/)
Supplement: Supplementary file 1

**
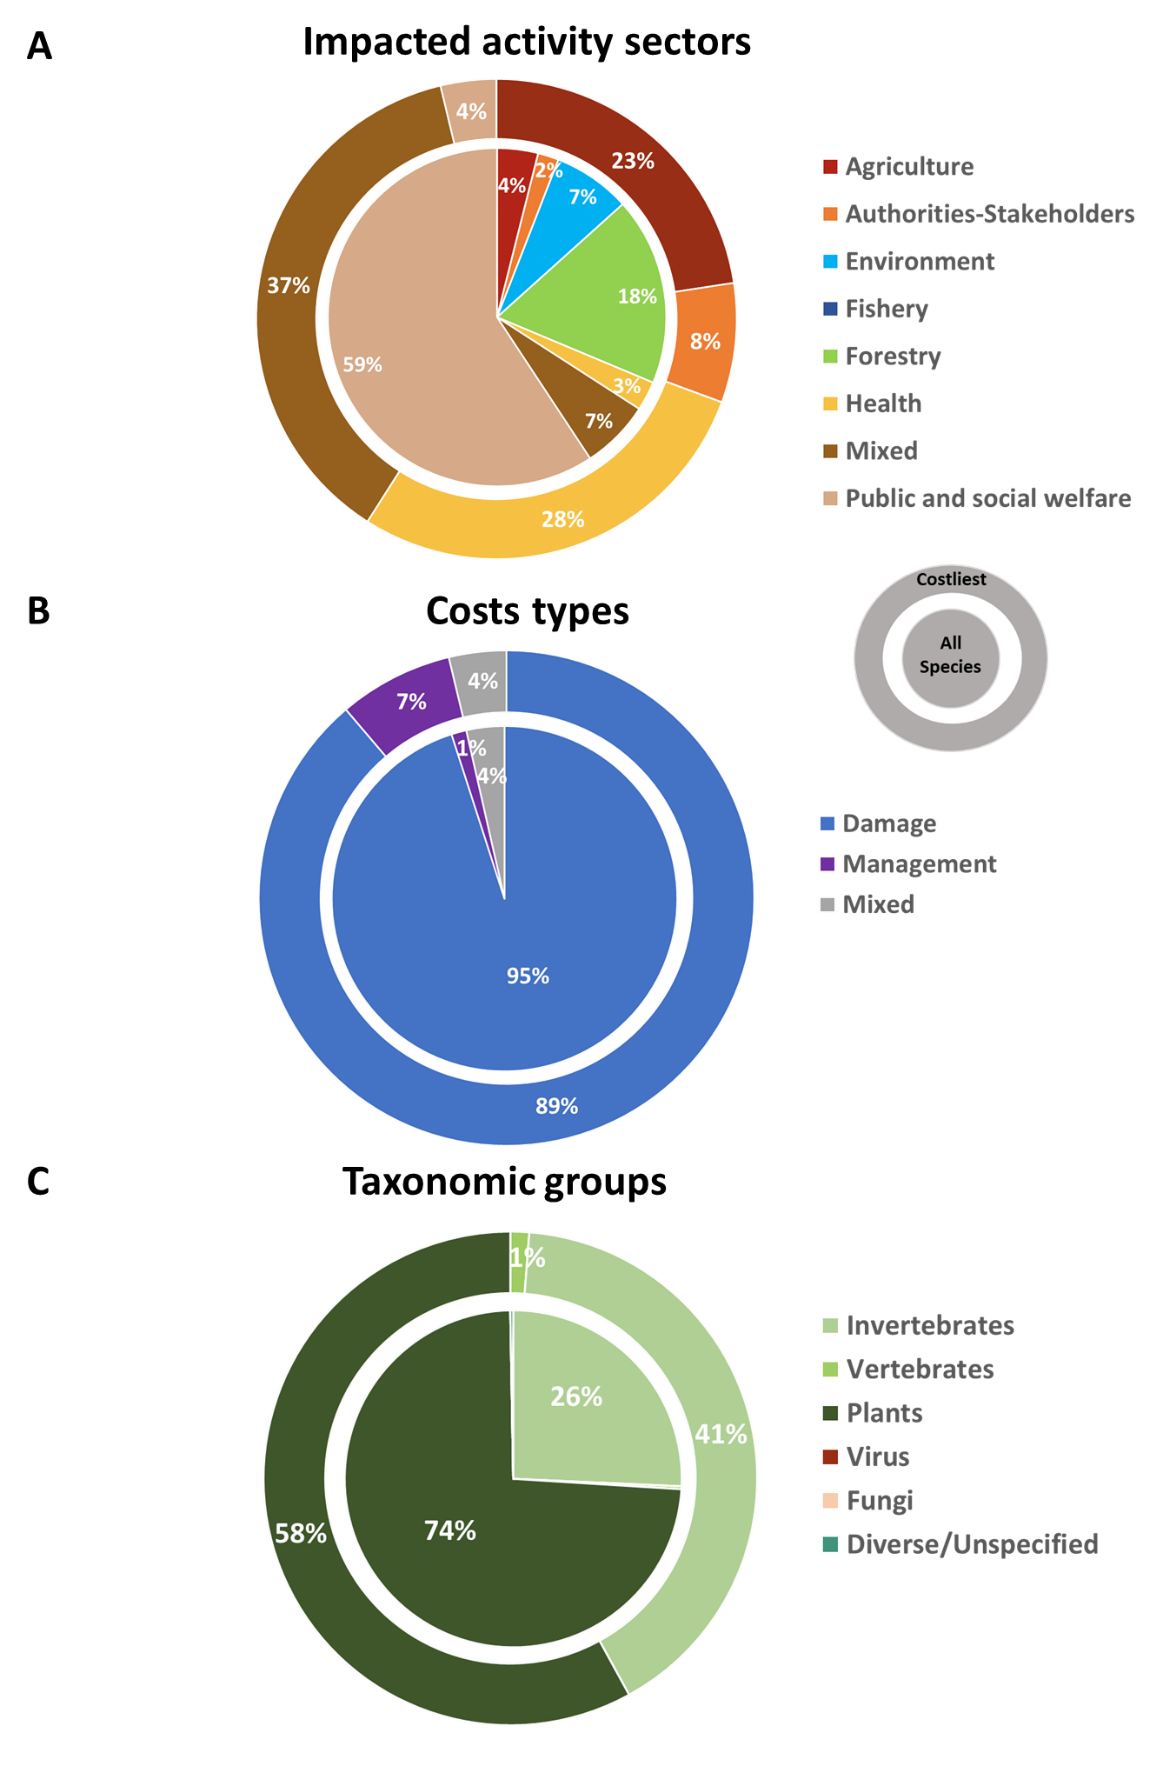
**
**Supplementary File 6.** Categorical representation of the cumulated costs caused by invasive alien species in metropolitan France and French overseas over the period 1993-2018 per (a) activity sectors, (b) cost types, and (c) taxonomic groups. Pie charts show the cost contribution of alien invasive species to the different categories; inner circle shows information based on all costs (i.e. observed and potential costs), whereas the outer circle restricts the information to the costliest invaders (i.e. observed costs > 1 US$ million) from France (*Aedes* spp., *Ambrosia* spp., *Lagorasiphon* major, *Lithobates catesbeianus*, *Ludwigia* spp., *Procambarus clarkii*, *Rattus* spp., *Reynoutria* spp., *Rusa timorensis*, *Vespa velutina, Felis catus, Baccharis halimifolia*) is presented in the surrounding circle.
